# Supplementary material for: Spatiotemporal patterns of locus coeruleus integrity predict cortical tau and cognition
Source: PubMed Central journal article supplement (PMC11108787; doi:10.1038/s43587-024-00626-y), 2024-04-25
Supplement: 43587_2024_626_MOESM1_ESM.pdf [file 43587_2024_626_MOESM1_ESM.pdf]

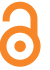

---

# **Spatiotemporal patterns of locus coeruleus integrity predict cortical tau and cognition**

---

In the format provided by the authors and unedited

## SUPPORTING INFORMATION

This file contains the following Supplementary Tables:

- [Supplementary Table 1. Characteristics of the sample. A\) In-vivo tau dataset. B\) Ex-vivo MAP dataset.](#)
- [Supplementary Table 2. Summary peak maxima statistics for the MTL clusters found in the in-vivo neuroimaging analysis investigating the relationship between LC intensity<sub>r</sub> at baseline and longitudinal cortical tau accumulation.](#)
- [Supplementary Table 3. Summary peak maxima statistics for the clusters found in the in-vivo neuroimaging analysis investigating the interaction between neocortical PiB-burden \(A \$\beta\$ \) and LC intensity<sub>r</sub> on longitudinal cortical tau accumulation.](#)
- [Supplementary Table 4. Spearman-rank partial correlation results between tangle density in LC and three regions of interest – hippocampus, entorhinal cortex \(EC\), and inferior temporal cortex \(IT\).](#)
- [Supplementary Table 5. Robust linear regression results between the LC-related tau clusters and PACC5 z-score.](#)
- [Supplementary Table 6. Robust linear regression results between the LC-related tau clusters and PACC5 z-score when including controlling for neocortical PiB-burden \(A \$\beta\$ \).](#)
- [Supplementary Table 7. Final list of 298 genes, which was obtained when considering the intersections between LC and only one other region.](#)
- [Supplementary Table 8. Enrichment analysis results.](#)
- [Supplementary Table 9. Probability of identifying AD risk genes within the LC-MTL- limbic common genes.](#)

**Supplementary Table 1. Characteristics of the sample.** A) In-vivo tau dataset. B) Exvivo MAP dataset

| <b>A) In-vivo tau dataset</b>         |                                |                              |
|---------------------------------------|--------------------------------|------------------------------|
|                                       | <b>Baseline</b>                | <b>Follow-up</b>             |
| n (% females)                         | 77 (65%)                       |                              |
| Mean age (years) (SD)                 | 66.98 (13.09)                  | 69.69 (7.64)                 |
| Mean years of education (SD)          | 15.96 (2.66)                   |                              |
| MMSE (score) (SD)                     | 29.08 (1.21)                   | 28.79 (1.17)                 |
| CDR: n = 0   0.5                      | 74   3                         | 71   6                       |
| Mean LC intensity <sub>r</sub> (SD)   | 1.33 (0.05)                    | 1.30 (0.04)                  |
| Mean PACC5 (z-score) (SD)             | 0.37 (0.70)                    | 0.28 (0.80)                  |
| <b>B) Exvivo MAP dataset</b>          |                                |                              |
|                                       | <b>Unimpaired participants</b> | <b>Impaired participants</b> |
| n (% females)                         | 66 (72.73%)                    | 94 (63.83%)                  |
| Mean age of death (years) (SD)        | 87.23 (5.93)                   | 89.70 (5.09)                 |
| Mean years of education (SD)          | 13.91 (2.58)                   | 15.29 (2.59)                 |
| Mean MMSE (score) (SD)                | 27.90 (1.81)                   | 20.89 (7.90)                 |
| Mean postmortem interval (hours) (SD) | 2.33 (3.09)                    | 7.42 (4.47)                  |
| A $\beta$ (%) (SD)                    | 2.33 (2.80)                    | 5.46 (4.98)                  |
| Mean tangle density HIPP (SD)         | 9.89 (11.83)                   | 19.59 (16.42)                |
| Mean tangle density EC (SD)           | 12.51 (13.11)                  | 17.97 (12.34)                |
| Mean tangle density IT (SD)           | 2.32 (6.99)                    | 8.07 (11.32)                 |
| Mean tangle density LC (SD)           | 1.39 (1.58)                    | 2.77 (2.64)                  |
| Mean neuron density LC (SD)           | 48.7 (17.4)                    | 44.43 (19.13)                |

**Missing data in-vivo dataset:** baseline and follow-up MMSE: 3 participants; follow-up PACC5: 3 participants. **Missing data ex-vivo dataset:** MMSE, 1 unimpaired participant, and 7 impaired participants had missing values; tangle density of the EC: 1 unimpaired participant. **Abbreviations:** A $\beta$  = beta-amyloid, CDR = Clinical Dementia Rating (CDR = 0, no impairment; CDR = 0.5, very mild dementia); EC = entorhinal cortex; HIPP = hippocampus; IT = inferior temporal; LC = locus coeruleus; MMSE = Mini-Mental State Examination; n = total number of individuals; SD = standard deviation. **Notes:** Neuronal density (counts/mm<sup>2</sup>) of the LC was examined using immunohistochemistry with a monoclonal anti-tyrosine hydroxylase antibody and paired helical filaments tau tangle density of the LC, hippocampus, entorhinal cortex, and inferior temporal cortex was examined using immunohistochemistry with an anti-paired helical filaments tau antibody AT8 (counts/mm<sup>2</sup>).

[Return to top](#)

**Supplementary Table 2. Summary peak maxima statistics for the MTL clusters found in the in-vivo neuroimaging analysis investigating the relationship between LC intensity<sub>r</sub> at baseline and longitudinal cortical tau accumulation.** We used whole-brain voxel-wise level GLM analysis (one-sided, p-value<0.05 cluster-corrected for multiple comparisons). Abbreviations: CDR= Clinical Dementia Rating; L = Left; MTL = medial temporal lobe; R = right.

| <b>Covariates</b>                                                  | <b>Region</b> | <b>z-statistic</b> | <b>p-value</b> |
|--------------------------------------------------------------------|---------------|--------------------|----------------|
| Sex and age                                                        | R MTL         | 2.78               | 0.005          |
|                                                                    | L MTL         | 2.94               | 0.003          |
| Sex, age, CDR, and A $\beta$                                       | R MTL         | 2.72               | 0.007          |
|                                                                    | L MTL         | 2.75               | 0.006          |
| Choroid plexus signal residualized<br>Sex and age                  | R MTL         | 2.65               | 0.008          |
|                                                                    | L MTL         | 2.05               | 0.040          |
| Choroid plexus signal residualized<br>Sex, age, CDR, and A $\beta$ | R MTL         | 2.29               | 0.022          |
|                                                                    | L MTL         | 1.74               | 0.049          |

[Return to top](#)

**Supplementary Table 3. Summary peak maxima statistics for the clusters found in the in-vivo neuroimaging analysis investigating the interaction between neocortical PiB-burden ( $A\beta$ ) and LC intensity<sub>r</sub> on longitudinal cortical tau accumulation.** We used whole-brain voxel-wise level GLM analysis (one-sided, p-value<0.05 cluster-corrected for multiple comparisons). Abbreviations: CDR= Clinical Dementia Rating; L = Left; MTL = medial temporal lobe; R = right.

| <b>Covariates</b>                                   | <b>Region</b>      | <b>z-statistic</b> | <b>p-value</b> |
|-----------------------------------------------------|--------------------|--------------------|----------------|
| Sex and age                                         | L MTL              | 3.36               | 0.002          |
|                                                     | R MTL              | 3.99               | 0.001          |
|                                                     | R occipital cortex | 3.64               | 0.001          |
| Sex age and CDR                                     | L MTL              | 2.72               | 0.007          |
|                                                     | R MTL              | 3.23               | 0.002          |
|                                                     | R occipital cortex | 3.38               | 0.001          |
| Choroid plexus signal residualized, sex, age        | L MTL              | 3.28               | 0.002          |
|                                                     | R MTL              | 4.21               | 0.001          |
|                                                     | R occipital cortex | 3.45               | 0.001          |
| Choroid plexus signal residualized sex, age and CDR | L MTL              | 2.63               | 0.009          |
|                                                     | R MTL              | 3.31               | 0.001          |
|                                                     | R occipital cortex | 3.43               | 0.006          |

[Return to top](#)

**Supplementary Table 4. Spearman-rank partial correlation results between tangle density in LC and three regions of interest – hippocampus, entorhinal cortex (EC), and inferior temporal cortex (IT).** Analyses were done separately for unimpaired and impaired (MCI/AD) individuals, adjusted for sex, age, postmortem interval, and global A $\beta$  score (two-sided,  $p < 0.05$ , uncorrected for multiple comparisons).

|                        | <b>RHO</b> | <b>p-value</b> | <b>n</b> |
|------------------------|------------|----------------|----------|
| Unimpaired individuals |            |                |          |
| Hippocampus            | 0.57       | 7.027e-05 ***  | 47       |
| EC                     | 0.64       | 5.389e-06 ***  | 46       |
| IT                     | 0.38       | 0.0138 *       | 46       |
| Impaired individuals   |            |                |          |
| Hippocampus            | 0.47       | 2.194e-05 ***  | 79       |
| EC                     | 0.48       | 1.408e-05 ***  | 78       |
| IT                     | 0.71       | 2.551e-12 ***  | 78       |

Legend:  $p\text{-value} < 0.05 = *$ ,  $p\text{-value} < 0.001 = **$ ,  $p\text{-value} < 0.0001 = ***$ .

[Return to top](#)

**Supplementary Table 5. Robust linear regression results between the LC-related tau clusters and PACC5 z-score.** Regression analyses were two-sided,  $p < 0.05$ , uncorrected for multiple comparisons.

| <b>Right LC-MTL cluster</b> |                 | <b>Estimate</b> | <b>Std. error</b> | <b>t-value</b> | <b>p-value</b> |
|-----------------------------|-----------------|-----------------|-------------------|----------------|----------------|
|                             | Right LC-MTL    | -2.01           | 0.40              | -4.99          | 4.61e-06***    |
|                             | Sex             | 0.40            | 0.14              | 2.82           | 0.01*          |
|                             | Years education | 0.04            | 0.03              | 1.75           | 0.08           |
|                             | Age             | -0.01           | 0.01              | -1.41          | 0.16           |
|                             | CDR             | -0.83           | 0.69              | -1.21          | 0.23           |
| <b>Left LC-MTL cluster</b>  |                 |                 |                   |                |                |
| <b>Left LC-MTL cluster</b>  |                 | <b>Estimate</b> | <b>Std. error</b> | <b>t-value</b> | <b>p-value</b> |
|                             | Left LC-MTL     | -2.14           | 0.48              | -4.42          | 3.57e-05***    |
|                             | Sex             | 0.39            | 0.15              | 2.64           | 0.01*          |
|                             | Years education | 0.05            | 0.03              | 1.98           | 0.05*          |
|                             | Age             | -0.02           | 0.01              | -2.04          | 0.05*          |
|                             | CDR             | -0.47           | 0.71              | -0.65          | 0.50           |

Legend:  $p\text{-value} < 0.05 = *$ ,  $p\text{-value} < 0.001 = **$ ,  $p\text{-value} < 0.0001 = ***$ .

[Return to top](#)

**Supplementary Table 6. Robust linear regression results between the LC-related tau clusters and PACC5 z-score when including controlling for neocortical PiB-burden (A $\beta$ ).** Regression analyses were two-sided,  $p < 0.05$ , uncorrected for multiple comparisons.

| <b>Right LC-MTL cluster</b> |                 | <b>Estimate</b> | <b>Std. error</b> | <b>t-value</b> | <b>p-value</b> |
|-----------------------------|-----------------|-----------------|-------------------|----------------|----------------|
|                             | Right LC-MTL    | -2.21           | 0.42              | -5.33          | 1.62e-06***    |
|                             | Sex             | 0.42            | 0.15              | 2.89           | 0.01*          |
|                             | Years education | 0.04            | 0.03              | 1.63           | 0.10           |
|                             | Age             | -0.01           | 0.01              | -1.47          | 0.14           |
|                             | CDR             | -0.98           | 0.72              | -1.37          | 0.17           |
|                             | A $\beta$       | 0.42            | 0.39              | 1.07           | 0.31           |
| <b>Left LC-MTL cluster</b>  |                 |                 |                   |                |                |
|                             | Left LC-MTL     | -2.44           | 0.55              | -4.44          | 4.02e-05***    |
|                             | Sex             | 0.41            | 0.16              | 2.56           | 0.01*          |
|                             | Years education | 0.05            | 0.03              | 1.80           | 0.07           |
|                             | Age             | -0.02           | 0.01              | -2.03          | 0.05*          |
|                             | CDR             | -0.71           | 0.78              | -0.90          | 0.36           |
|                             | A $\beta$       | 0.40            | 0.44              | 0.89           | 0.38           |

Legend: p-value < 0.05 = \*, p-value < 0.001 = \*\*, p-value < 0.0001 = \*\*\*.

[Return to top](#)



**Supplementary Table 7. Final list of 298 genes, which was obtained when considering the intersections between LC and only one other region.**

| LC ∩ mOFC | LC ∩ hippocampus | LC ∩ insula | LC ∩ amygdala | LC ∩ rACC |
|-----------|------------------|-------------|---------------|-----------|
| N=58      | N=62             | N=56        | N=77          | N=45      |
| ANKRD55   | APOL6            | ACLY        | ABHD3         | ACOT12    |
| ATBF1     | ATL1             | AKR1C1      | AK3           | AK7       |
| B4GALT7   | ATP1B1           | AP3M1       | AKIRIN1       | ARSD      |
| BHMT2     | C12orf60         | BRCC3       | BAG3          | AVEN      |
| C22orf36  | C14orf50         | C17ORF106   | C10orf88      | BCL7C     |
| C7orf73   | C1orf161         | C1QL4       | C15orf41      | BRUNOL6   |
| CALY      | CALCA            | C20orf194   | C17orf71      | C16orf82  |
| CCNG1     | CDS2             | C2orf67     | C2orf29       | C19orf31  |
| CD55      | CHAC2            | CCDC127     | C5orf28       | C3orf67   |
| CDC25A    | CHAT             | CDC42       | C9orf61       | CALB2     |
| CDNF      | CHGB             | CDV3        | CAPZA1        | CALCR     |
| CRNDE     | CHORDC1          | CEP70       | CBLB          | CCR7      |
| CXorf30   | CISD2            | CHRFAM7A    | CD164         | DPYSL3    |
| CYB5R1    | CLCN3            | CKAP4       | CDC16         | EBPL      |
| DMRT1     | COPB2            | CPAMD8      | CSNK1G3       | ECEL1     |
| FAM114A2  | DAP3             | DRD2        | CYP51A1       | EPHX2     |
| FAM133A   | EXOC1            | EEF1E1      | DAAM1         | FLJ30901  |
| FAM173B   | FAM136A          | ERP29       | EPDR1         | GALR2     |
| FAM27A    | GATA6            | FGF1        | EPS8          | GCNT2     |
| FAM82B    | GCAT             | FXR1        | FARSB         | GDPD2     |
| GFPT1     | HSPA4            | GBE1        | FTSJD1        | GSTP1     |
| GPR68     | HUWE1            | GPN1        | FXN           | HSD17B7   |
| GRINL1A   | IGFBPL1          | GRB10       | GALNT13       | HSP90AB1  |
| HIBCH     | IMPAD1           | GRN         | GDF11         | IRS4      |
| HSD17B10  | ITGA4            | GTF2H3      | GJB7          | KLHDC10   |
| HSPA13    | KCNE1L           | HSPB1       | GNAI3         | KRT18P26  |
| IFIT5     | KIAA1211         | INTS4       | GOLPH3L       | LOC400750 |
| IMPACT    | KIF21A           | KANK4       | INSIG1        | ME2       |
| INS       | KLHDC8A          | KCTD10      | IP6K2         | NXNL2     |
| KBTBD10   | LARP1            | KCTD20      | IRX3          | PCDH21    |
| LSS       | LIAS             | KRTAP20-1   | LHX9          | PFDN2     |
| MAPRE1    | LOC100130054     | L1TD1       | LOC550643     | PMCHL2    |
| MMEL1     | LOC100133008     | LPIN1       | LOC729852     | POFUT2    |
| MPZL1     | LRRC16B          | MRPS33      | MAGT1         | PTS       |
| NANOS1    | MAP1B            | NEK7        | MAMLD1        | RPH3AL    |
| NINL      | NDUFAF2          | OR6C76      | MGAT2         | SCEL      |
| OLFM2     | OPA1             | PAFAH2      | MRPL13        | SGSM1     |
| OSBPL9    | PODXL2           | PCYOX1L     | MUT           | SMAD9     |
| PFDN4     | PRKACA           | PFN4        | OR6C65        | SPRYD4    |
| PGAM2     | PRLHR            | PHACTR2     | P4HA1         | SRPX      |
| PHF11     | RAB39            | POM121C     | PDCD5         | SULF1     |
| PIPOX     | RAB3GAP2         | PTDSS1      | PDE11A        | TRMT112   |
| PODNL1    | RAB9B            | PTGES3      | PELI2         | UBR1      |
| PPAT      | RFK              | RAB30       | PIGP          | YKT6      |
| REC8      | RGS2             | RBMS1       | PIH1D2        | ZMYND12   |
| RGS3      | RHBDD3           | RNF152      | POMC          |           |

|         |         |          |          |  |
|---------|---------|----------|----------|--|
| RIT1    | RHEB    | S100A10  | POMP     |  |
| SGMS2   | RNF128  | SCN7A    | PRDX6    |  |
| SHOX2   | RSPO4   | SERPINB8 | PTGFR    |  |
| SLC41A2 | SCOC    | SLC16A3  | RAB10    |  |
| SLC9A7  | SLC46A1 | SPOCK3   | RAB21    |  |
| STK32A  | SMARCA1 | STEAP3   | RAB3B    |  |
| STT3A   | STRA13  | TCEAL7   | RAN      |  |
| SYT9    | TEX15   | TMEM63C  | RAP1B    |  |
| TPST1   | TMEM182 | TP53I3   | RHOQ     |  |
| VWA5A   | TPH2    | ZNF558   | RPAP3    |  |
| WRN     | TRIM61  |          | SHC1     |  |
| ZNF568  | TTC1    |          | SLC25A46 |  |
|         | VEPH1   |          | STC1     |  |
|         | WARS    |          | STX17    |  |
|         | WNT11   |          | THAP9    |  |
|         | ZNF676  |          | TMEM167A |  |
|         |         |          | TMEM170A |  |
|         |         |          | TMEM19   |  |
|         |         |          | TMEM27   |  |
|         |         |          | TMEM38B  |  |
|         |         |          | TMEM97   |  |
|         |         |          | TRAM1    |  |
|         |         |          | UPRT     |  |
|         |         |          | VBP1     |  |
|         |         |          | WDR48    |  |
|         |         |          | WWTR1    |  |
|         |         |          | XPO4     |  |
|         |         |          | ZC3HAV1  |  |
|         |         |          | ZMPSTE24 |  |
|         |         |          | ZNF10    |  |
|         |         |          | ZNF569   |  |

[Return to top](#)

**Supplementary Table 8. Enrichment analysis results.** Protein-coding genes associated with the main gene ontology functionality: regulation of protein transport.

| <b>Regulation of protein transport (n=34)</b> |         |       |          |
|-----------------------------------------------|---------|-------|----------|
| CDC42                                         | RPH3AL  | RAB21 | MAPRE1   |
| CYP51A1                                       | BAG3    | CALY  | GRB10    |
| DRD2                                          | HUWE1   | MAP1B | S100A10  |
| HSP90AB1                                      | ERP29   | WWTR1 | ZMPSTE24 |
| INS                                           | RHBDD3  | CALCA |          |
| INSIG1                                        | GOLPH3L | FGF1  |          |
| PRKACA                                        | EXOC1   | HSPB1 |          |
| RAN                                           | XPO4    | RHOQ  |          |
| GPR68                                         | NDUFAF2 | CBLB  |          |
| PDCD5                                         | SYT9    | ITGA4 |          |

[Return to top](#)

**Supplementary Table 9. Probability of identifying AD risk genes within the LC-MTL-limbic common genes.** A random permutation analysis (10,000 iterations) and 1-tail probabilities were calculated.

| <b>Number of matching genes</b> | <b>Probability</b> |
|---------------------------------|--------------------|
| 0                               | 18.1 %             |
| 1                               | 18.5 %             |
| 2                               | 9.5 %              |
| 3                               | 3.0 %              |
| 4                               | 0.7 %              |
| 5                               | 0.2 %              |
| 6                               | < 0.01 %           |

[Return to top](#)
